# Supplementary material for: A breakthrough in the intrinsic multiferroic temperature region in Prussian blue analogues
Source: Royal Society of Chemistry journal article supplement (doi:10.1039/c9ra09224b), 2019-01-01
Supplement: c9ra09224b1.pdf [file c9ra09224b1.pdf]

# A Breakthrough in the Intrinsic Multiferroic Temperature Region in Prussian Blue Analogues

*Qingrong Kong, Ruixuan Qin, Dong Li, Haixia Zhao\*, Yanping Ren, Lasheng Long\**  
*and Lansun Zheng*

Collaborative Innovation Center of Chemistry for Energy Materials, State Key  
Laboratory of Physical Chemistry of Solid Surfaces and Department of Chemistry  
College of Chemistry and Chemical Engineering, Xiamen University, Xiamen  
361005, China.

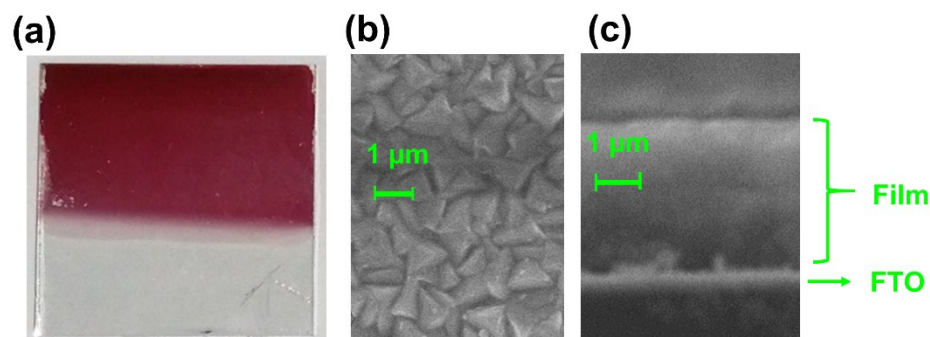

**Figure S1.** (a) The photograph of colored film **1**. (b) The topographic image of the film surface. (c) The thickness for the film **1**.

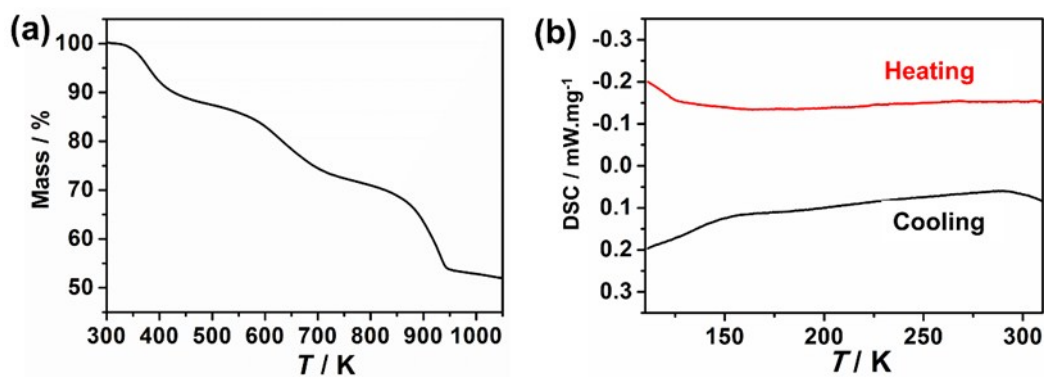

**Figure S2.** (a) TGA curve of crushed film 1. (b) DSC data of crushed film 1 from 100 K to 310 K.

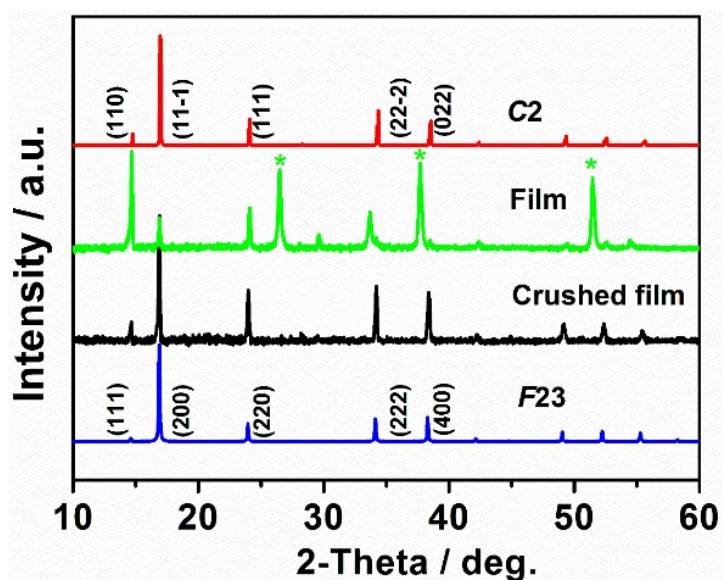

**Figure S3.** The XRD patterns of film, and crushed film for compound 1. The peaks marked with \* is the diffraction peaks of FTO substrate.

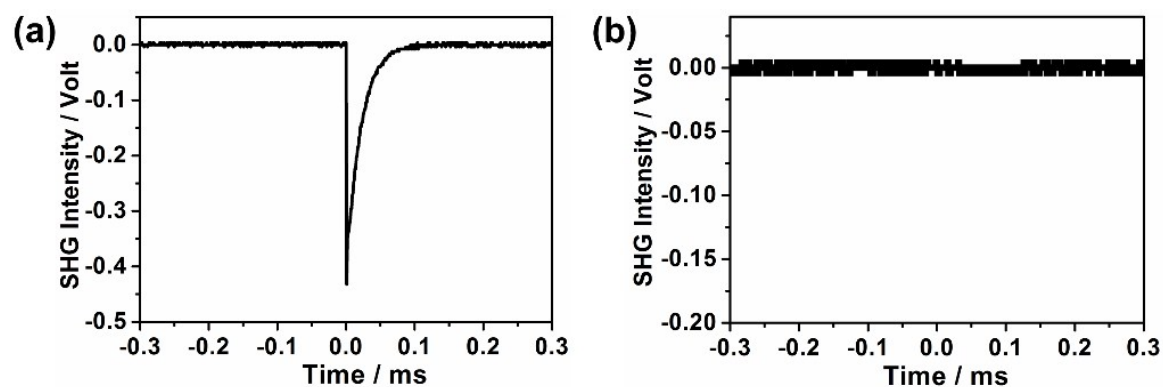

**Figure S4.** (a). The film 1 SHG intensity oscilloscope traces at room temperature. (b)

SHG signals detected for the crushed film **1** at room temperature.

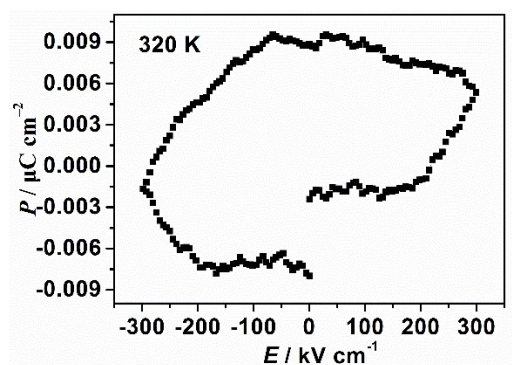

**Figure S5.** Polarization versus electric field curve ( $P$ - $E$  hysteresis loop) at 320 K of film **1**.

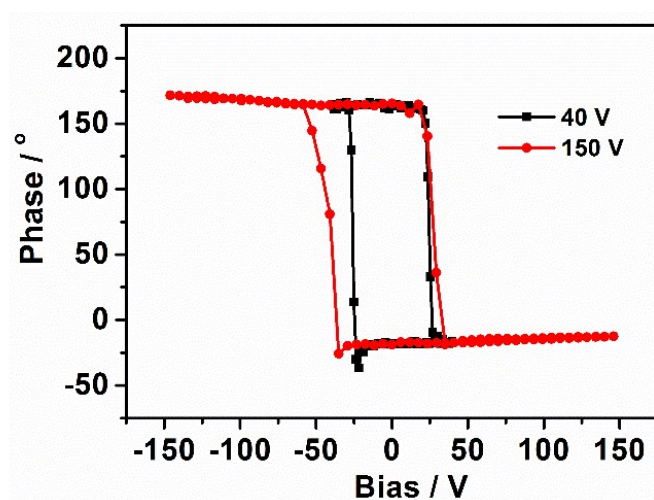

**Figure S6.** PFM phase hysteresis loop at the bias voltage value of 40 V and 150 V of film **1**.

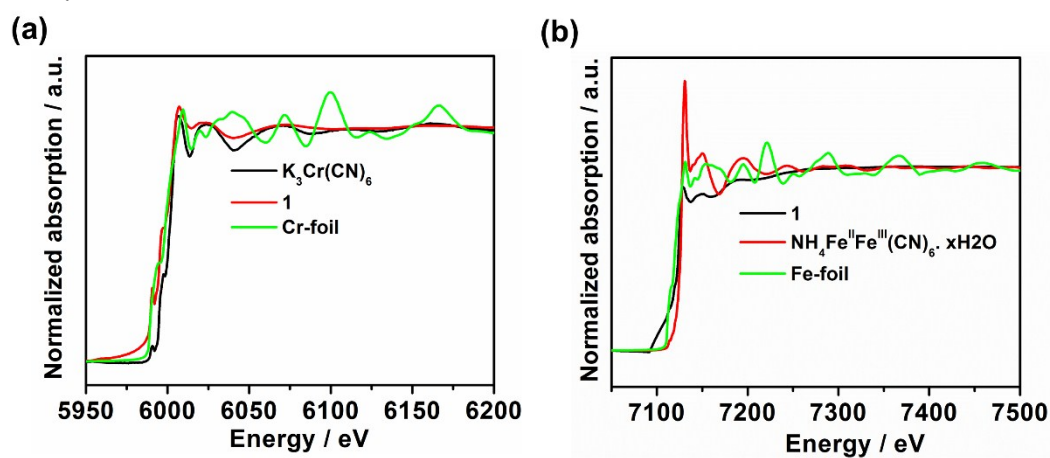

**Figure S7.** The normalized X-ray adsorption spectrum of Cr and Fe samples.

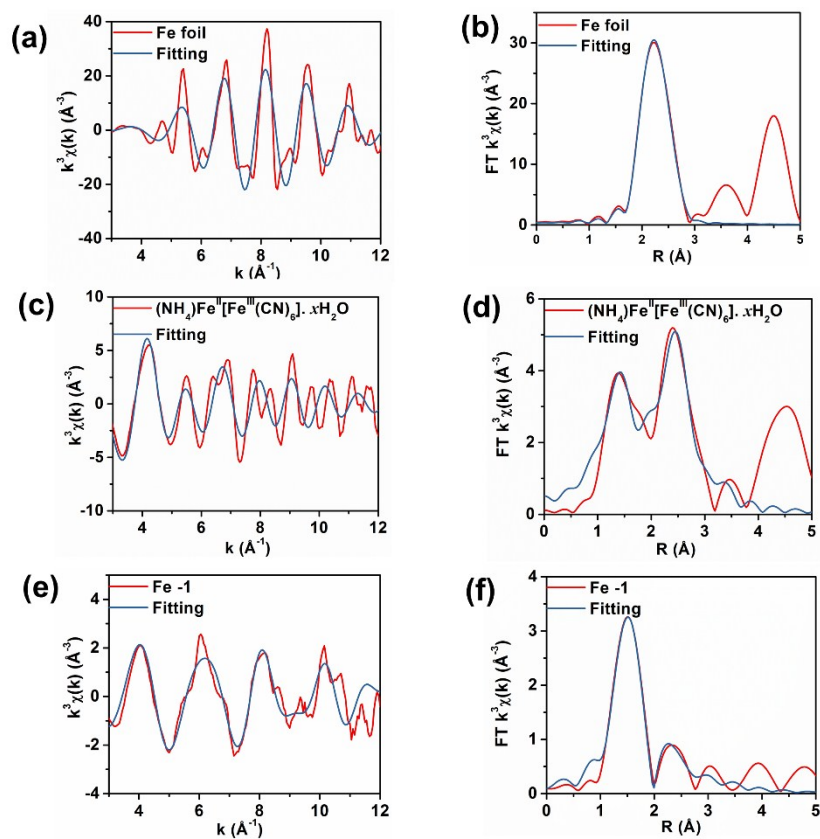

Figure S8. The EXAFS fitting results of Fe samples.

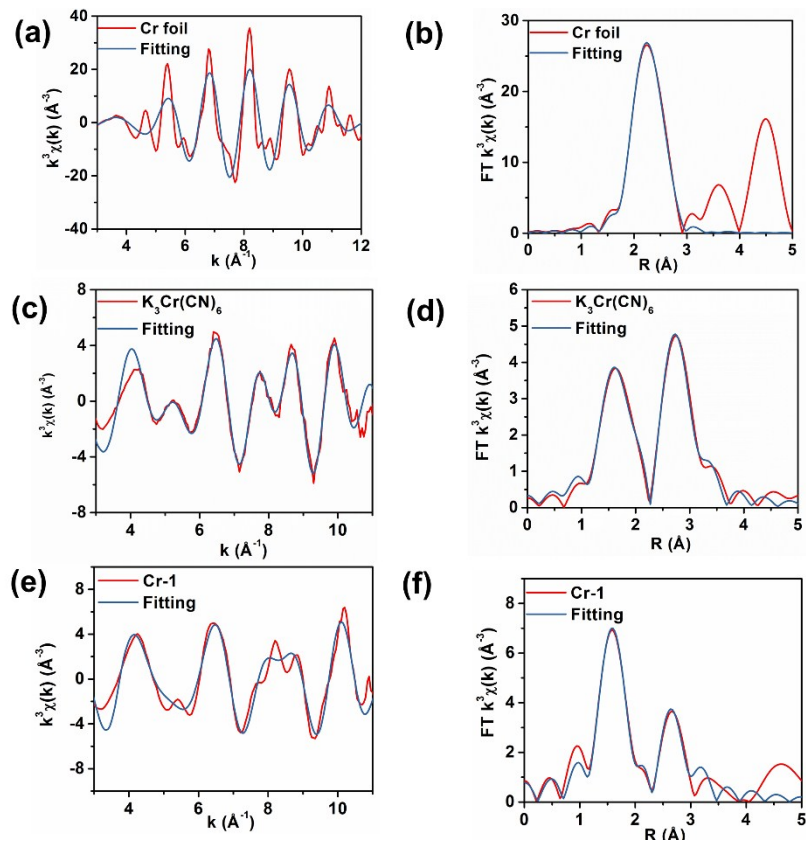

**Figure S9.** The EXAFS fitting results of Cr samples.

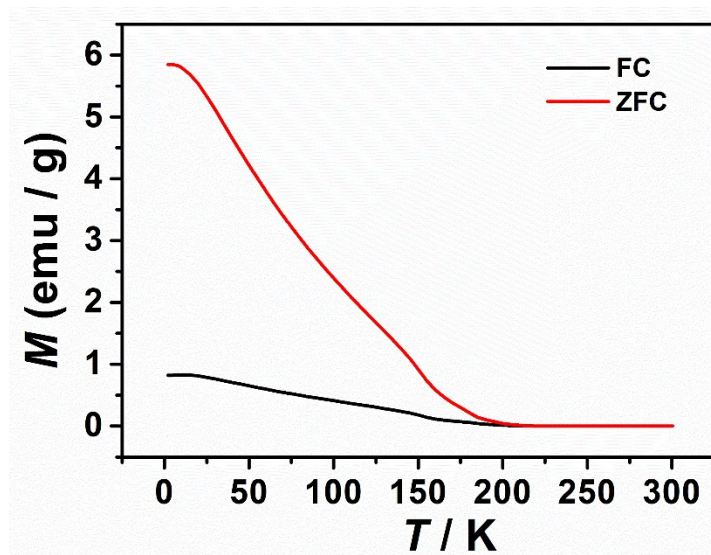

**Figure S10.** ZFC/FC magnetization curves of crushed film 1 under an applied magnetic field of 10 Oe.

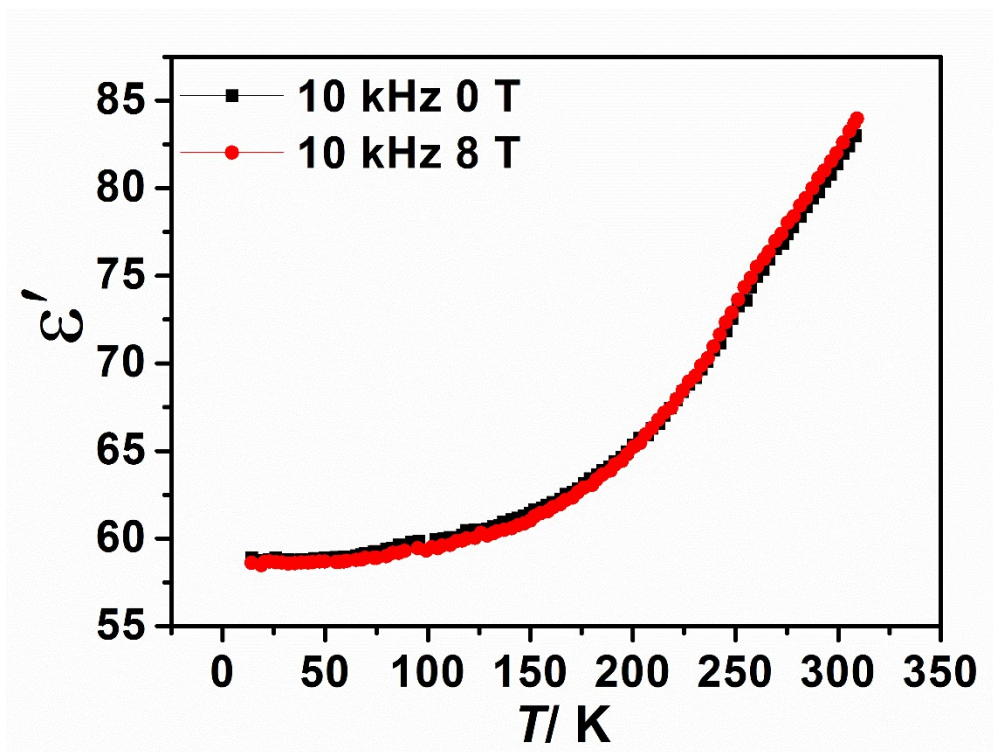

**Figure 11.** Dielectric constant versus temperature at 10 kHz measured in zero field and in an external magnetic field of 8 T for film 1

**Table S1.** The results of ICP-OES of **1**.

| Sample 1 | Fe ( $\mu\text{g/L}$ ) | Cr ( $\mu\text{g/L}$ ) | n (Fe) :n (Cr) |
|----------|------------------------|------------------------|----------------|
| Film 1-1 | 164                    | 669                    | 1 : 4.436      |
| Film 1-2 | 168                    | 623                    | 1 : 3.980      |
| Film 1-3 | 201                    | 751                    | 1 : 4.023      |
| Film 1-4 | 253                    | 893                    | 1 : 3.787      |
| Film 1-5 | 183                    | 742                    | 1 : 4.368      |
| Film 1-6 | 259                    | 920                    | 1 : 3.825      |

**Table S2.** EXAFS fitting parameters at the Cr and Fe K-edge various samples ( $S_0^2=0.72, 0.70$ )

| Sample                                                                     | Path    | C.N.           | R ( $\text{\AA}$ ) | $\sigma^2 \times 10^3$ ( $\text{\AA}^2$ ) | $\Delta E$ (eV) | R factor |
|----------------------------------------------------------------------------|---------|----------------|--------------------|-------------------------------------------|-----------------|----------|
| Cr foil                                                                    | Cr-Cr   | 8*             | 2.48 $\pm$ 0.01    | 5.2 $\pm$ 1.3                             | 3.8 $\pm$ 1.6   | 0.002    |
|                                                                            | Cr-Cr   | 6*             | 2.87 $\pm$ 0.01    | 4.0 $\pm$ 1.7                             | 4.1 $\pm$ 2.3   |          |
| $\text{K}_3\text{Cr}(\text{CN})_6$                                         | Cr-C/N  | 4.7 $\pm$ 1.0  | 2.05 $\pm$ 0.01    | 3.1 $\pm$ 1.6                             | -3.3 $\pm$ 3.6  | 0.005    |
|                                                                            | Cr-C/N  | 7.1 $\pm$ 1.5  | 3.25 $\pm$ 0.01    | 4.8 $\pm$ 1.4                             | -1.8 $\pm$ 1.8  |          |
| Cr - <b>1</b>                                                              | Cr- C/N | 4.9 $\pm$ 1.3  | 2.03 $\pm$ 0.02    | 6.7 $\pm$ 2.1                             | 3.9 $\pm$ 3.6   | 0.005    |
|                                                                            | Cr- C/N | 3.8 $\pm$ 2.3  | 3.03 $\pm$ 0.03    | 13.2 $\pm$ 4.4                            | 15.9 $\pm$ 4.6  |          |
| Fe foil                                                                    | Fe-Fe   | 8*             | 2.46 $\pm$ 0.01    | 4.7 $\pm$ 1.1                             | 6.1 $\pm$ 1.6   | 0.002    |
|                                                                            | Fe-Fe   | 6*             | 2.84 $\pm$ 0.01    | 5.0 $\pm$ 2.1                             | 4.6 $\pm$ 2.9   |          |
| $(\text{NH}_4)\text{Fe}[\text{Fe}(\text{CN})_6] \cdot x\text{H}_2\text{O}$ | Fe- C/N | 6.7 $\pm$ 2.6  | 1.97 $\pm$ 0.03    | 12.0 $\pm$ 3.0                            | -8.0 $\pm$ 2.2  | 0.018    |
|                                                                            | Fe- C/N | 12.7 $\pm$ 3.8 | 3.18 $\pm$ 0.02    | 7.5 $\pm$ 3.0                             |                 |          |
| Fe - <b>1</b>                                                              | Fe- C/N | 4.3 $\pm$ 1.2  | 2.02 $\pm$ 0.02    | 6.3 $\pm$ 2.5                             | -5.5 $\pm$ 3.5  | 0.018    |
|                                                                            | Fe- C/N | 1.7 $\pm$ 2.0  | 3.17 $\pm$ 0.06    | 10.6 $\pm$ 8.7                            | -5.9 $\pm$ 5.3  |          |

<sup>a</sup>N: coordination numbers; <sup>b</sup>R: bond distance; <sup>c</sup> $\sigma^2$ : Debye-Waller factors; <sup>d</sup>  $\Delta E_0$ : the inner potential correction. R factor: goodness of fit. \* the experimental EXAFS fit of metal foil by fixing CN as the known crystallographic value.
